# Supplementary material
Source: publisher site journal article supplement (https://www.dovepress.com/article/298409)
Supplement: Supplementary file 1 [file get_supplementary_file.php]

## Epworth Sleepiness Scale

Name: \_\_\_\_\_ Today's date: \_\_\_\_\_

Your age (Yrs): \_\_\_\_\_ Your sex (Male = M, Female = F): \_\_\_\_\_

How likely are you to doze off or fall asleep in the following situations, in contrast to feeling just tired?

This refers to your usual way of life in recent times.

Even if you haven't done some of these things recently try to work out how they would have affected you.

Use the following scale to choose the most appropriate number for each situation:

- 0 = would never doze
- 1 = slight chance of dozing
- 2 = moderate chance of dozing
- 3 = high chance of dozing

*It is important that you answer each question as best you can.*

Situation

Chance of Dozing (0-3)

Sitting and reading \_\_\_\_\_

Watching TV \_\_\_\_\_

Sitting, inactive in a public place (e.g. a theatre or a meeting) \_\_\_\_\_

As a passenger in a car for an hour without a break \_\_\_\_\_

Lying down to rest in the afternoon when circumstances permit \_\_\_\_\_

Sitting and talking to someone \_\_\_\_\_

Sitting quietly after a lunch without alcohol \_\_\_\_\_

In a car, while stopped for a few minutes in the traffic \_\_\_\_\_

|       |
|-------|
| _____ |
| _____ |
| _____ |
| _____ |
| _____ |
| _____ |
| _____ |
| _____ |

**THANK YOU FOR YOUR COOPERATION**
